# Supplementary material for: First-principles design of hetero CoM (M = 3d, 4d, 5d block metals) double-atom catalysts for oxygen evolution reaction under alkaline conditions
Source: Royal Society of Chemistry journal article supplement (doi:10.1039/d2na00107a), 2022-01-01
Supplement: d2na00107a1.pdf [file d2na00107a1.pdf]

## Supporting Information

### **First-principles Design of Hetero CoM (M = 3d, 4d, 5d Block Metals) Double Atom Catalysts for Oxygen Evolution Reaction in alkaline condition**

Eoyoon Lee<sup>a</sup>, Sun Hee Choi<sup>c</sup> and Hyung Chul Ham<sup>a,b,\*</sup>

<sup>a</sup> Department of Chemistry and Chemical Engineering, Education and Research Center for Smart Energy and Materials, Inha University, Incheon, 22212, South Korea

<sup>b</sup> Program in Smart Digital Engineering, Inha University, Incheon, 22212, Republic of Korea

<sup>c</sup> Hydrogen and Fuel Cell Research Center, Korea Institute of Science and Technology (KIST), 5, Hwarangno 14-gil, Seongbuk-gu, Seoul, 02792, Republic of Korea

*\*Corresponding author*

Prof. Hyung Chul Ham (E-mail: ham.hyungchul@inha.ac.kr; Telephone: +82-32-860-7467, Fax: +82-032-873-0181)

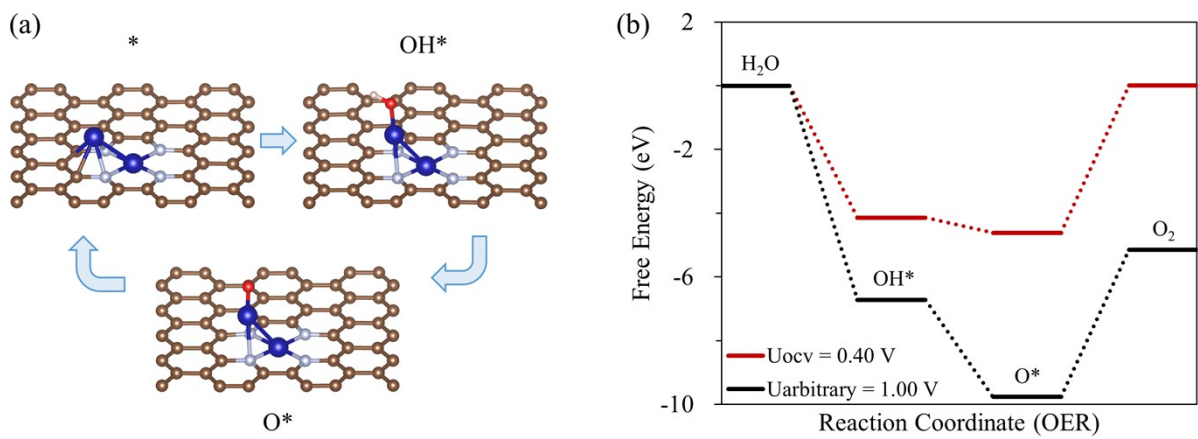

**Figure S1.** (a) dissociative reaction mechanism of OER on Co<sub>2</sub>/N<sub>4</sub>G without hydrogen superoxide(OOH\*) formation, (b) free energy diagram for dissociative pathway on Co<sub>2</sub>/N<sub>4</sub>G at OCV condition ( $U_{ocv} = 0.401$  V) and arbitrary potential ( $U_{arbitrary} = 1.00$  V).

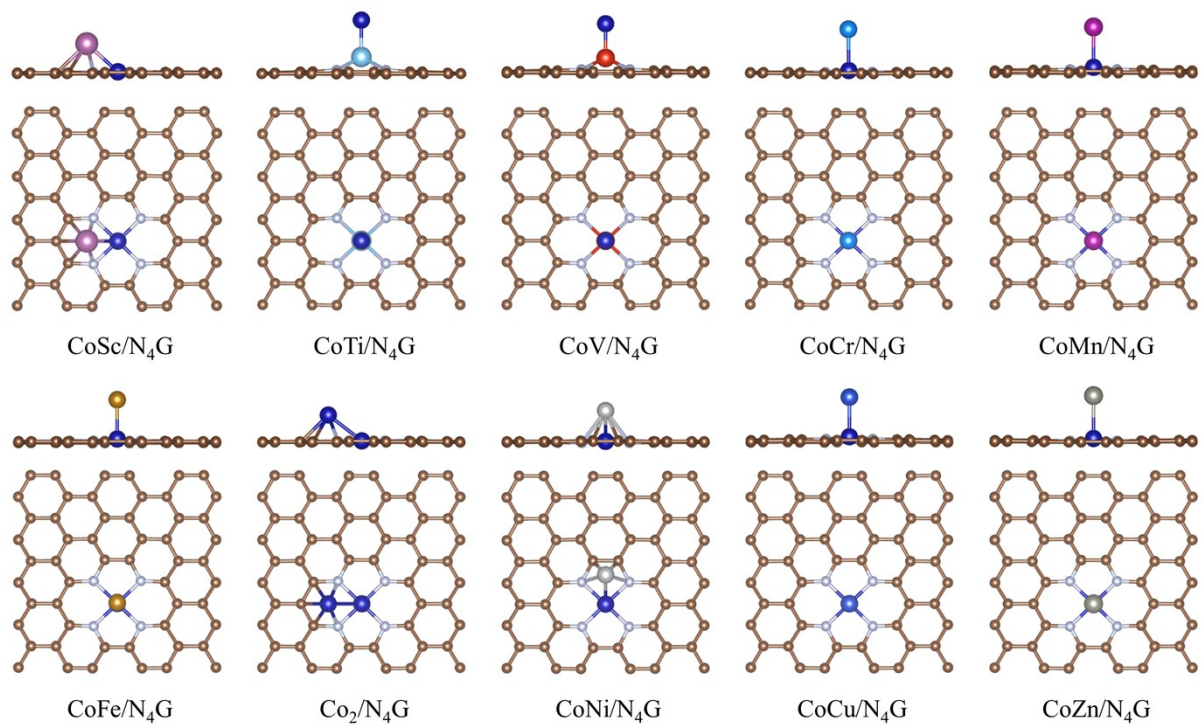

**Figure S2.** The most stable structures of CoM/N<sub>4</sub>G catalysts determined by the formation energy.

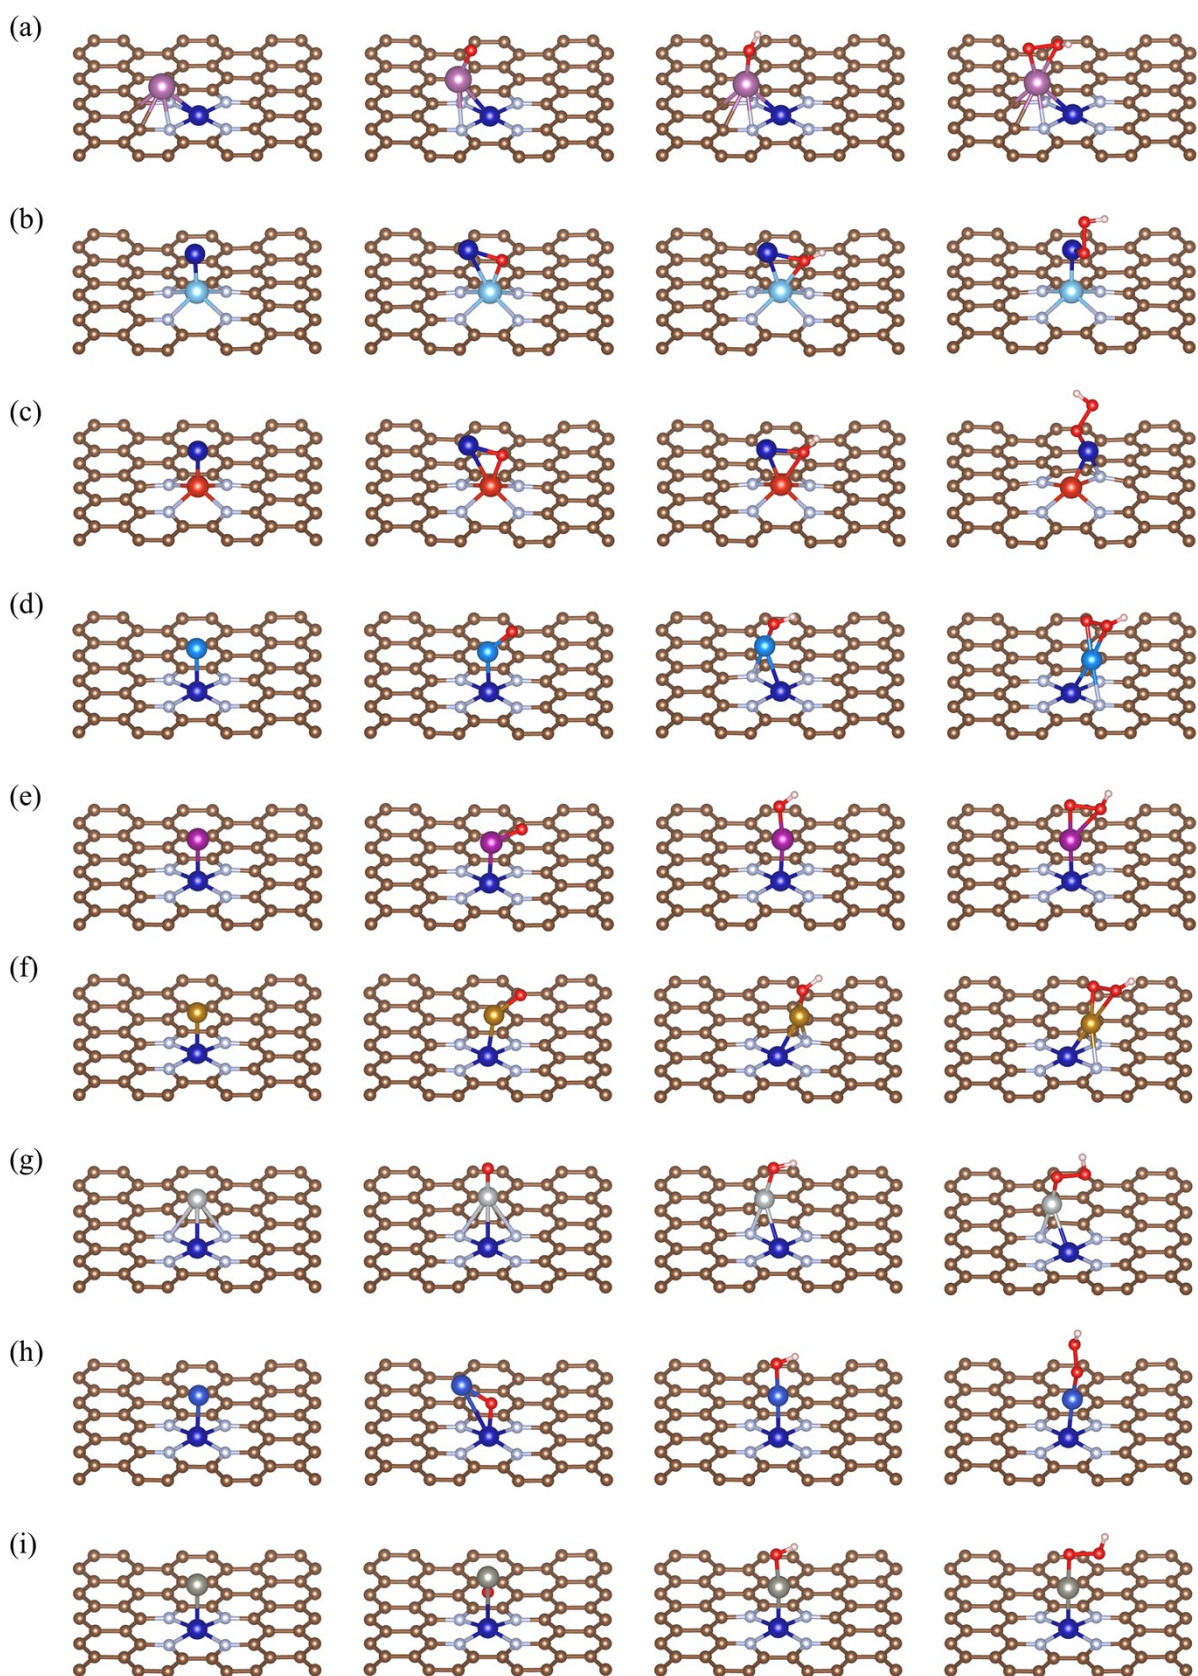

**Figure S3.** The most favorable adsorption configurations of intermediates for (a) CoSc/N<sub>4</sub>G, (b) CoTi/N<sub>4</sub>G, (c) CoV/N<sub>4</sub>G, (d) CoCr/N<sub>4</sub>G, (e) CoMn/N<sub>4</sub>G, (f) CoFe/N<sub>4</sub>G, (g) CoNi/N<sub>4</sub>G, (h) CoCu/N<sub>4</sub>G and (i) CoZn/N<sub>4</sub>G.

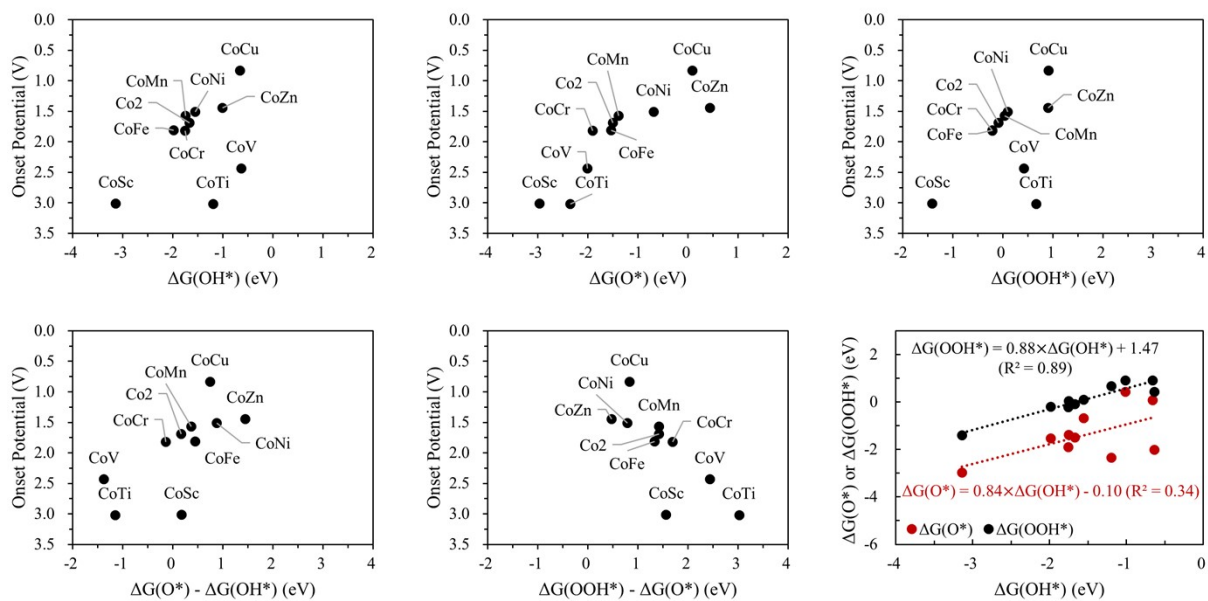

**Figure S4.** The correlation between OER activity (onset potential) and  $\Delta G(\text{adsorbate}^*)$ .



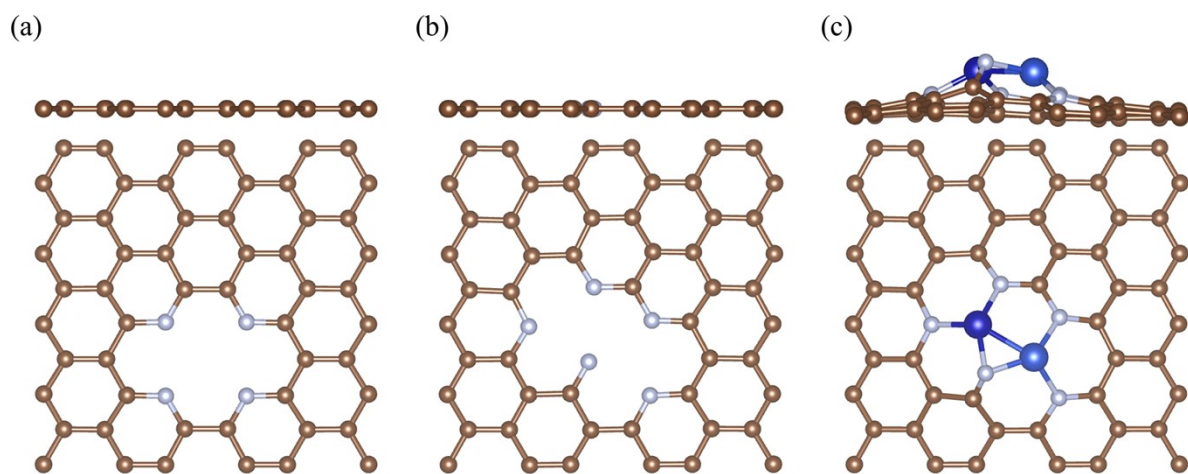

**Figure S5.** The stable structure of (a) N<sub>4</sub>G support (di-vacancy model), (b) N<sub>5</sub>G support (two mono-vacancy model) and (c) CoCu/N<sub>5</sub>G catalyst.

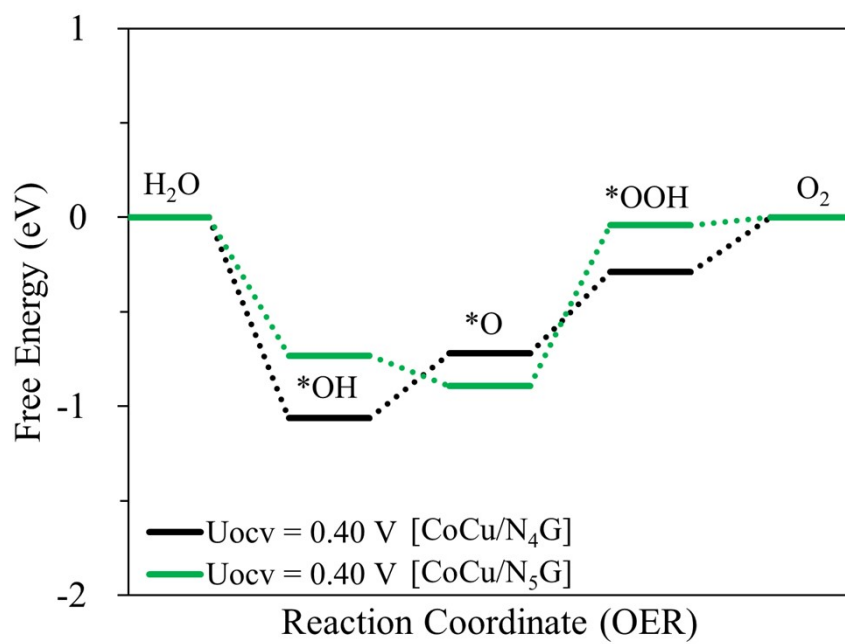

**Figure S6.** The free energy variations at OCV condition for CoCu/N<sub>4</sub>G and CoCu/N<sub>5</sub>G catalysts.

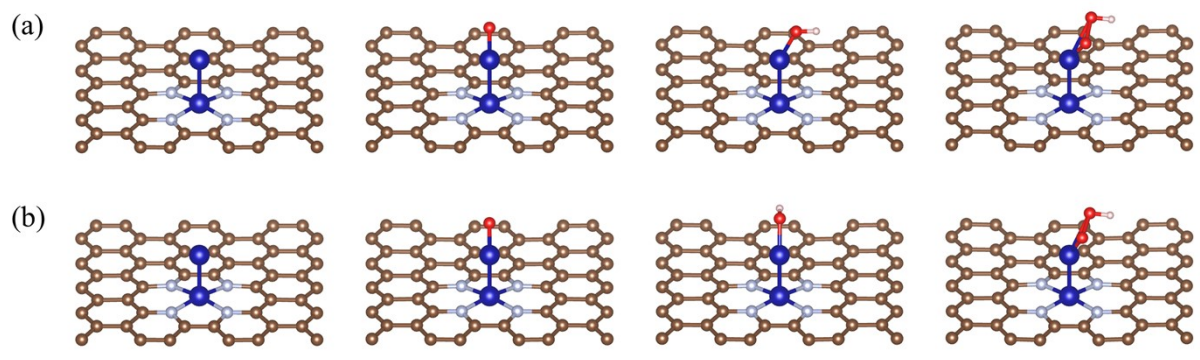

**Figure S7.** The most favorable adsorption configurations of intermediates for (a)  $\text{CO}_2/\text{N}_4\text{G}_{\text{config}}$  model and (b)  $\text{CO}_2/\text{N}_4\text{G}_{\text{strain}}$ .



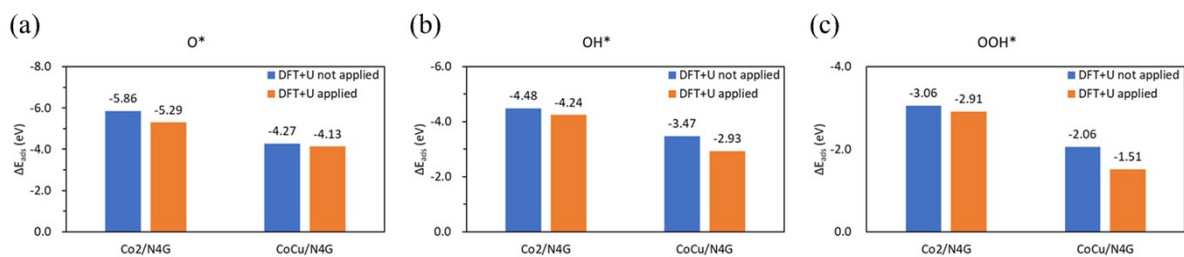

**Figure S8.** Comparison of adsorption energy on Co<sub>2</sub>/N<sub>4</sub>G and CoCu/N<sub>4</sub>G catalysts. Blue bar and orange bar correspond to the adsorption energy when DFT+U [U=4 (Co) and U=8.5 (Cu)] is not applied and applied, respectively.

**Table S1.** The dissolution potential of CoM/N<sub>4</sub>G catalysts (M = Co or Cu). we calculated dissolution potential of those catalysts, where the one solute atom (single metal atom, Co or Cu) is dissolved into the electrolyte, on the basis of precedent research (Electrochimica Acta, 52 (2007) 5829–5836). The dissolution potential ( $U_{diss}$ ) can be calculated by following

equation:  $U_{diss} = U_{diss}^o - \frac{E_{bind}}{ne}$  and  $E_{bind}$  is defined as  $E_{bind} = E_{CoM/N_4G} - E_{Co/N_4G} - E_M$ , where  $U_{diss}^o$ ,  $E_{CoM/N_4G}$ ,  $E_{Co/N_4G}$ ,  $E_M$ , and  $n$  are the standard reduction potential of solute M, total energy of CoM/N<sub>4</sub>G (M = Co or Cu), Co/N<sub>4</sub>G, isolated M atom and the number of electrons involved in dissolution, respectively.

| Catalyst                          | Solute M | $U_{diss}$ |
|-----------------------------------|----------|------------|
| Co <sub>2</sub> /N <sub>4</sub> G | Co       | 0.53 V     |
| CoCu/N <sub>4</sub> G             | Co       | 1.78 V     |
|                                   | Cu       | 1.04 V     |

**Table S2.** The standard reduction potential of Co and Cu bulk.

| Reaction                        | $U_{diss}^o$ |
|---------------------------------|--------------|
| $Co^{2+} + 2e^- \rightarrow Co$ | -0.28 V      |
| $Cu^{2+} + 2e^- \rightarrow Cu$ | 0.34 V       |

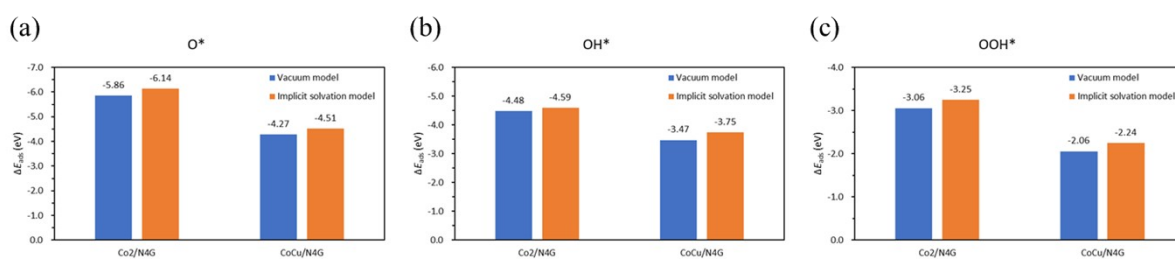

**Figure S9.** Comparison of adsorption energy on  $\text{Co}_2/\text{N}_4\text{G}$  and  $\text{CoCu}/\text{N}_4\text{G}$  catalysts. Blue bar and orange bar correspond to the adsorption energy in vacuum model and implicit solvation model, respectively. Here, we took solvent effect into account by using the implicit solvation model implemented in VASPsol, which is simple and cost-effective method in computational study.
